# Supplementary material for: Organotin(iv) compounds with high catalytic activities and selectivities in the glycerolysis of triacylglycerides
Source: Royal Society of Chemistry journal article supplement (doi:10.1039/c7cy01559c), 2017-01-01
Supplement: c7cy01559c1.pdf [file c7cy01559c1.pdf]

## Organotin(IV) compounds with high catalytic activities and selectivities in the glycerolysis of triacylglycerides

### Supplementary Information

**Table S1.** Wavenumbers ( $\text{cm}^{-1}$ ) and attributions of the main absorption on infrared regions for the Sn(IV) complexes.

| Attributions                    | Bands ( $\text{cm}^{-1}$ ) |                                   |                                    |           |                     |
|---------------------------------|----------------------------|-----------------------------------|------------------------------------|-----------|---------------------|
|                                 | BuSnCl <sub>3</sub>        | Bu <sub>2</sub> SnCl <sub>2</sub> | Bu <sub>2</sub> SnLau <sub>2</sub> | BuSnO(OH) | Bu <sub>2</sub> SnO |
| $\nu_{\text{O-H}}$              | -                          | -                                 | -                                  | -         | 3253                |
| $\nu_{\text{as}} \text{CH}_3$   | 2960                       | 2960                              | 2960                               | 2960      | 2960                |
| $\nu_{\text{as}} \text{CH}_2$   | 2930                       | 2930                              | 2930                               | 2930      | 2930                |
| $\nu_{\text{s}} \text{CH}_3$    | 2870                       | 2870                              | 2870                               | 2870      | 2870                |
| $\nu_{\text{s}} \text{CH}_2$    | 2853                       | 2853                              | 2853                               | 2853      | 2853                |
| $\nu \text{C=O}$                | -                          | -                                 | 1733                               | -         | -                   |
| $\delta_{\text{s}} \text{CH}_2$ | 1466                       | 1466                              | 1466                               | 1466      | 1466                |
| $\delta_{\text{s}} \text{CH}_3$ | 1377                       | 1377                              | 1377                               | 1377      | 1377                |
| $\nu \text{C-O}$                | -                          | -                                 | 1069                               | -         | -                   |
| $\nu \text{C-O}$                | -                          | -                                 | 911                                | -         | -                   |
| $\rho_{\text{as}} \text{CH}_2$  | 709                        | 676                               | 719                                | -         | 719                 |
| $\nu_{\text{s}} \text{O-Sn-O}$  | -                          | -                                 | -                                  | 560       | 553                 |

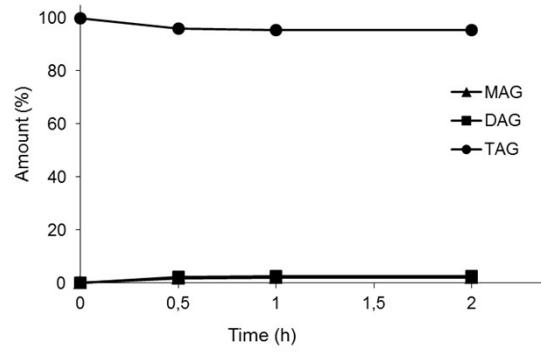

**A**

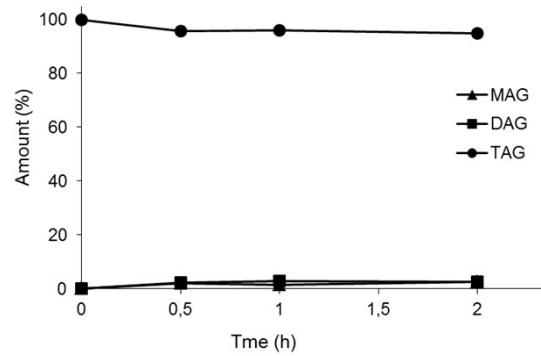

**B**

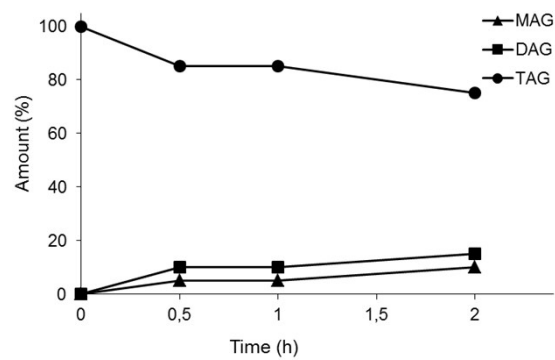

**C**

**Figure S1.** Glycerolysis of TAGs (soybean oil) at different temperatures without catalyst: A = 150 °C, B = 180 °C and C = 220 °C, at the ratio of TAGs/GLY of 1/6.

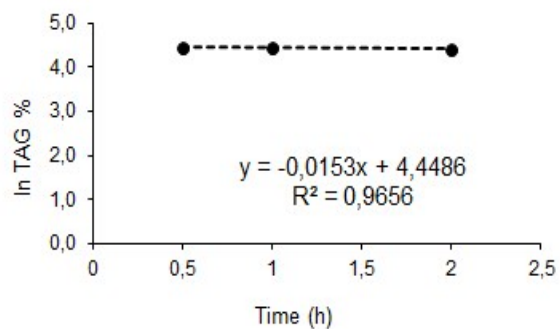

A=150 °C

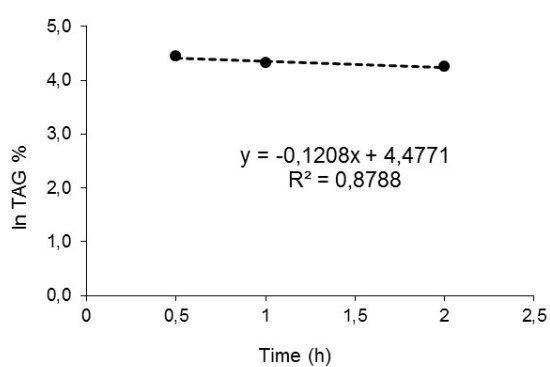

B=180 °C

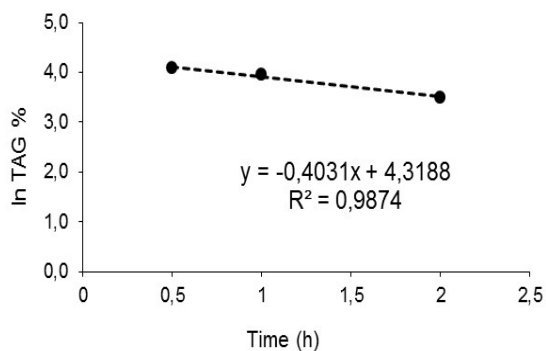

C=220 °C

**Figure S2.** *ln* TAG (%) as a function of time (h) at a molar ratio of TAGs/GLY/Bu<sub>2</sub>SnLau<sub>2</sub> of 1/6/0.01: A = 150 °C, B = 180 °C and C = 220 °C.

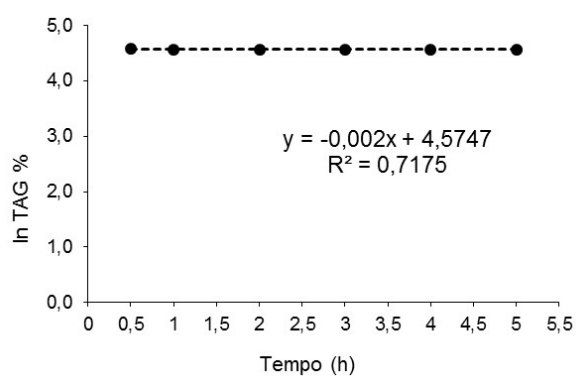

A=200 °C

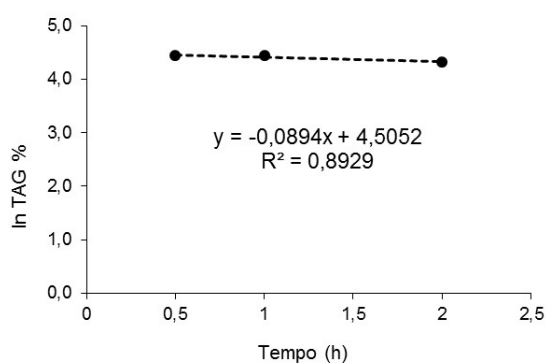

B=220 °C

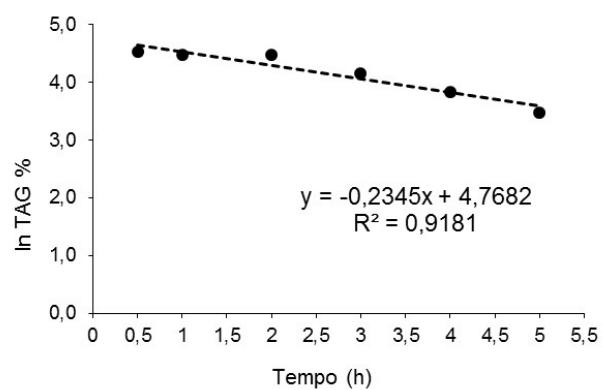

C=240 °C

**Figure S3.**  $\ln$  TAG (%) as a function of time (h) at a molar ratio of TAGs/GLY of 1/6: A = 200 °C, B = 220 °C and C = 240 °C. In the absence of a catalyst, the test was performed at 200, 220 and 240 °C, since at 150 and 180 °C, there were no TAG conversions (see Figure 2).

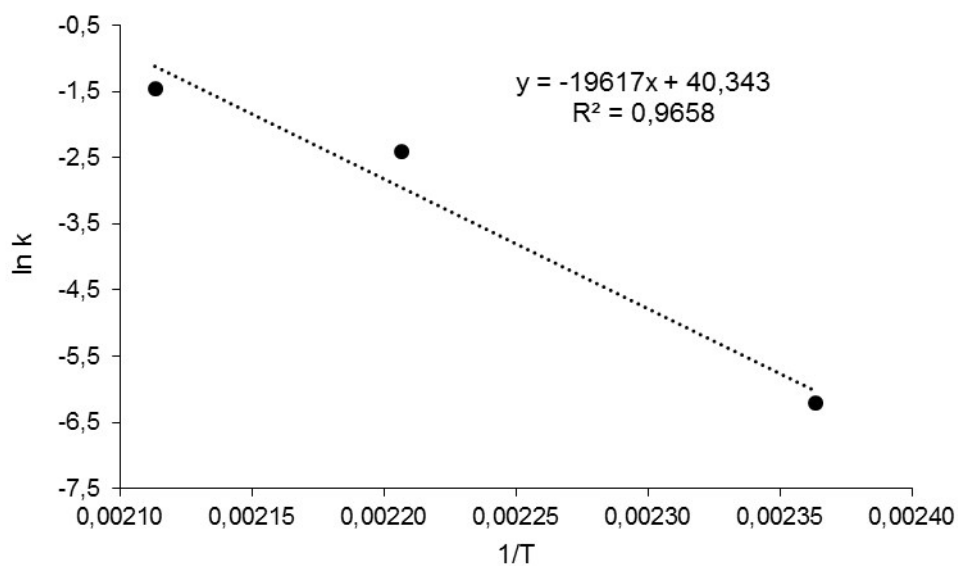

A=without catalyst

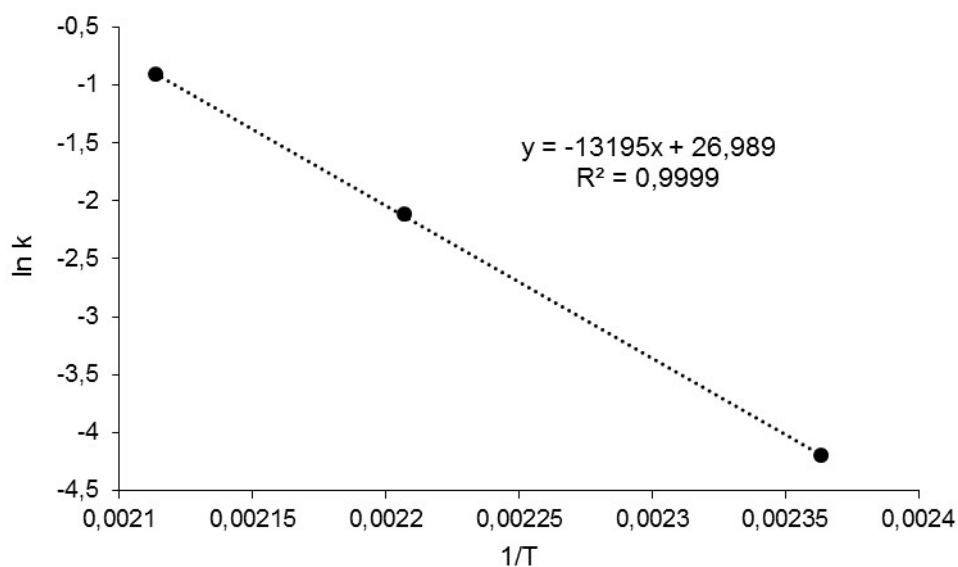

B=Bu<sub>2</sub>Lau<sub>2</sub>Sn

**Figure S4.**  $\ln k$  (%) as a function of  $1/T$  (K) with a catalyst present at a ratio of TAGs/GLY/Bu<sub>2</sub>SnLau<sub>2</sub> of 1/6/0.01 and in the absence of catalyst at a ratio of TAGs/GLY of 1/6.

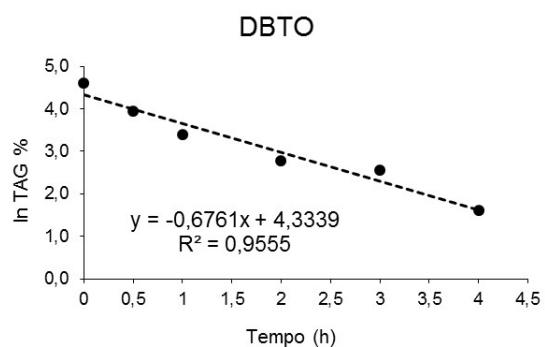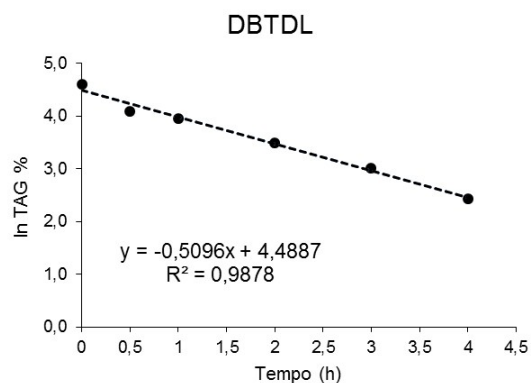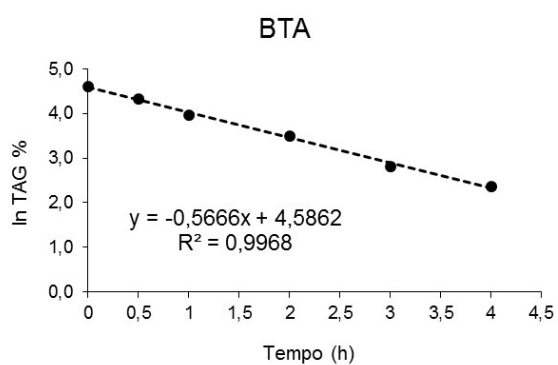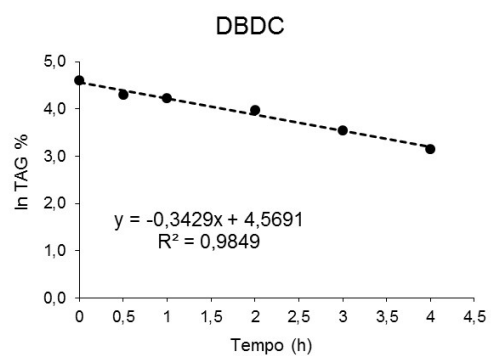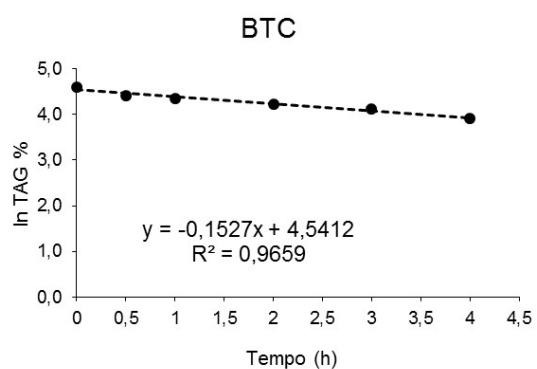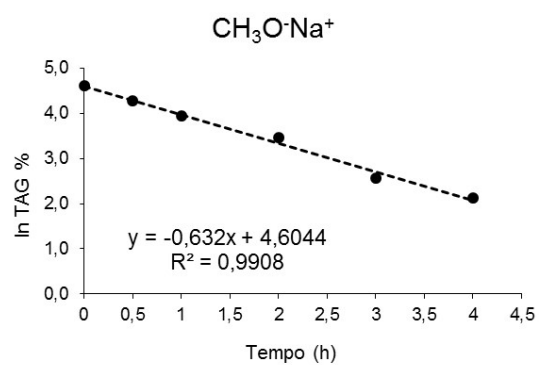

**Figure S5.** *ln* TAG (%) as a function of time (h) at 220 °C at a molar ratio of TAGs/GLY/ CAT of 1/6/0.01 using Bu<sub>2</sub>SnO (A), BuSnO(OH) (B), Bu<sub>2</sub>Lau<sub>2</sub>Sn (C), Bu<sub>2</sub>SnCl<sub>2</sub> (D), BuSnCl<sub>3</sub> (E) and CH<sub>3</sub>O<sup>-</sup>Na<sup>+</sup> (F).
